# Supplementary material
Source: ML conference proceedings conference paper supplement (https://proceedings.neurips.cc/paper_files/paper/2021/hash/29c0c0ee223856f336d7ea8052057753-Abstract.html)
Supplement: Supplementary file 1 [file 29c0c0ee223856f336d7ea8052057753-Supplemental.pdf]

# 1 Experiments on more models and datasets

## 1.1 More dataset

Pascal VOC dataset is widely used in object detection, so we conduct the extend experiment results on Faster R-CNN and RetianNet on Pascal VOC. The ResNet50 based FasterRCNN surpasses the baseline by 1.7% mAP. The ResNet50 based on RetinaNet gain 2.9% mAP. It can be seen that our method has also achieved significant improvements on other data sets.

| Model                  | AP50 |
|------------------------|------|
| faster-Res101(teacher) | 81.3 |
| faster-Res50(student)  | 79.5 |
| ours                   | 81.2 |
| gains                  | 1.7  |
| Retina-Res101(teacher) | 80.1 |
| Retina-Res50(student)  | 77.3 |
| ours                   | 80.2 |
| gains                  | 2.9  |

## 1.2 More detector

YOLOF is the latest detector without FPN module, so it is different in construction from the detector in our paper. Therefore YOLOF is suitable to evaluate the generalization of our methods. The following table shows the experiment results on YOLOF on MS COCO2017. YOLOF with ResNet50 achieves 39.3% in mAP, meanwhile surpasses the baseline by 1.8% mAP.

| model                 | mAP  | AP50 | AP75 | AP_S | AP_M | AP_L |
|-----------------------|------|------|------|------|------|------|
| YOLOF-Res50(student)  | 37.5 | 57   | 40.4 | 19   | 42   | 53.2 |
| YOLOF-Res101(teacher) | 39.7 | 59   | 42.9 | 20.5 | 44.3 | 55   |
| ours                  | 39.3 | 58.5 | 42.5 | 20.5 | 44   | 54.5 |

# 2 Performance gain from object regions

Figure 1 is an analysis of the PR curves of different sizes of target objects. We compare the student network, the bounding box based distillation method, and the FRS method. We find that the FRS method has a relatively good improvement for Cor, Loc, Sim, and Oth. Besides, it improves the big objects especially obviously. The result demonstrates that the FRS method can well promote the feature extraction ability of student detector learning teacher detector.

## Checklist

The checklist follows the references. Please read the checklist guidelines carefully for information on how to answer these questions. For each question, change the default **[TODO]** to **[Yes]**, **[No]**, or **[N/A]**. You are strongly encouraged to include a **justification to your answer**, either by referencing the appropriate section of your paper or providing a brief inline description. For example:

- Did you include the license to the code and datasets? **[Yes]** See Section ??.
- Did you include the license to the code and datasets? **[No]** The code and the data are proprietary.
- Did you include the license to the code and datasets? **[N/A]**

Please do not modify the questions and only use the provided macros for your answers. Note that the Checklist section does not count towards the page limit. In your paper, please delete this instructions block and only keep the Checklist section heading above along with the questions/answers below.

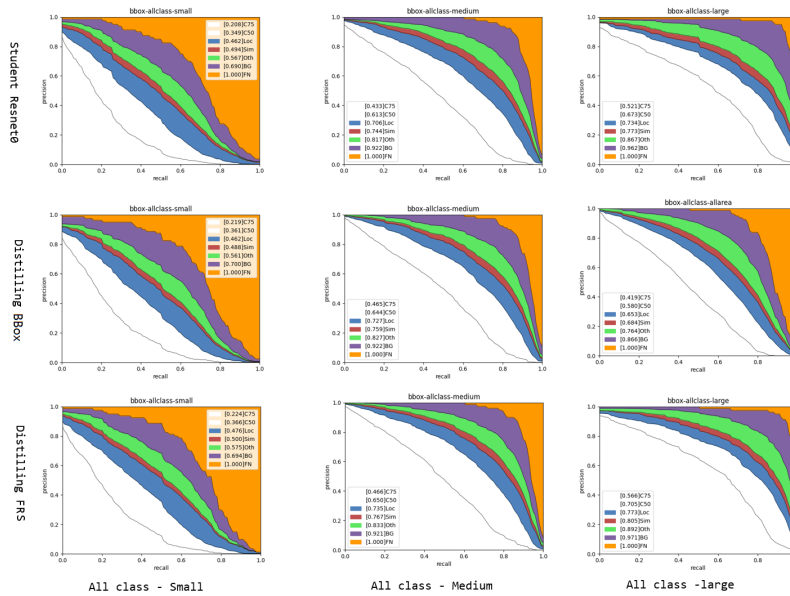

Figure 1: Precision-Recall curves of different distillation methods on COCO benchmark. The student detector is RetinaNet50, and The teacher detector is RetinaNet101

1. For all authors...
  - (a) Do the main claims made in the abstract and introduction accurately reflect the paper’s contributions and scope? [Yes]
  - (b) Did you describe the limitations of your work? [Yes]
  - (c) Did you discuss any potential negative societal impacts of your work? [Yes]
  - (d) Have you read the ethics review guidelines and ensured that your paper conforms to them? [Yes]
2. If you are including theoretical results...
  - (a) Did you state the full set of assumptions of all theoretical results? [Yes]
  - (b) Did you include complete proofs of all theoretical results? [Yes]
3. If you ran experiments...
  - (a) Did you include the code, data, and instructions needed to reproduce the main experimental results (either in the supplemental material or as a URL)? [Yes]
  - (b) Did you specify all the training details (e.g., data splits, hyperparameters, how they were chosen)? [Yes]
  - (c) Did you report error bars (e.g., with respect to the random seed after running experiments multiple times)? [Yes]
  - (d) Did you include the total amount of compute and the type of resources used (e.g., type of GPUs, internal cluster, or cloud provider)? [Yes]
4. If you are using existing assets (e.g., code, data, models) or curating/releasing new assets...
  - (a) If your work uses existing assets, did you cite the creators? [Yes]
  - (b) Did you mention the license of the assets? [Yes]
  - (c) Did you include any new assets either in the supplemental material or as a URL? [No]
  - (d) Did you discuss whether and how consent was obtained from people whose data you’re using/curating? [No]
  - (e) Did you discuss whether the data you are using/curating contains personally identifiable information or offensive content? [No]
5. If you used crowdsourcing or conducted research with human subjects...

- (a) Did you include the full text of instructions given to participants and screenshots, if applicable? [N/A]
- (b) Did you describe any potential participant risks, with links to Institutional Review Board (IRB) approvals, if applicable? [N/A]
- (c) Did you include the estimated hourly wage paid to participants and the total amount spent on participant compensation? [N/A]
